# Supplementary material
Source: publisher figshare collection journal article supplement (https://karger.figshare.com/ndownloader/files/28453308)
Supplement: Supplementary file 1 [file 28453308]

**Table s1. Supplementary information for Table. 2 Biochemical baseline characteristics before ECAD session**

|  | **Pre SPAD** | **Pre MARS** | **P value** |
| --- | --- | --- | --- |
| Total bilirubin, µmol/L | 489 ± 162 | 490 ± 160 | 0.99 |
| Conjugated bilirubin, µmol/L | 361 ± 122 | 356 ± 114 | 0.90 |
| Unbound bilirubin, µmol/L | 129 ± 55 | 134 ± 59.0 | 0.78 |
| Ammonia, µmol/L | 78 ± 36 | 69 ± 43 | 0.58 |
| Bile acids, µmol/L | 165 ± 109 | 159 ± 82 | 0.84 |
| Serum albumin g/L | 33 ± 8 | 34 ± 7 | 0.82 |
| Serum creatinine, µmol/L | 195 ± 103 | 186 ± 105 | 0.79 |
| Serum urea, mmol/L | 19.9 ± 6.5 | 18.5 ± 7.7 | 0.55 |
| pH | 7.39 ± 0.04 | 7.40 ± 0.04 | 0.29 |
| Lactate, mmol/L | 2.3 ± 0.8 | 2.3 ± 1.3 | 0.98 |

Data are expressed as mean ± standard deviation. ECAD, extracorporeal albumin dialysis; SPAD, single pass albumin dialysis; MARS, molecular adsorbent recirculating system.
